# Supplementary material for: m5UPred: A Web Server for the Prediction of RNA 5-Methyluridine Sites from Sequences
Source: PubMed Central journal article supplement — Mol Ther Nucleic Acids. 2020 Sep 30;22:742–7. doi: 10.1016/j.omtn.2020.09.031 (PMC7595847; doi:10.1016/j.omtn.2020.09.031), 2020-09-30
Supplement: mmc1.pdf [file mmc1.pdf]

**OMTN, Volume 22**

## **Supplemental Information**

### **m5UPred: A Web Server for the Prediction of RNA 5-Methyluridine Sites from Sequences**

**Jie Jiang, Bowen Song, Yujiao Tang, Kunqi Chen, Zhen Wei, and Jia Meng**

Table S1. Overlapped Positive m5U Sites Between Different Techniques and Cell Types

| Separation Method | Mode | Condition  | Site # | Overlap # | Total # |
|-------------------|------|------------|--------|-----------|---------|
| <b>Technique</b>  | Full | miCLIP-Seq | 2,225  | 521       | 3,696   |
|                   |      | FICC-Seq   | 1,471  |           |         |
| <b>Cell type</b>  | Full | HEK293     | 2,467  | 732       | 3,696   |
|                   |      | HAP1       | 1,229  |           |         |

Table S2. Positive m5U Sites in Different RNAs Families

| Gene region     | CDS | Intergenic | Intronic | ncRNA_intronic | Ipstream | 3'UTR | 5'UTR |
|-----------------|-----|------------|----------|----------------|----------|-------|-------|
| Number of sites | 175 | 1,880      | 654      | 232            | 277      | 50    | 29    |

Table S3. Performance Evaluation of m5UPred by Cross-technique and Cross-cell Type Validation Using Different Machine Learning Classifiers

|                            | Mode            | Classifier | Sn (%) | Sp (%) | ACC (%) | MCC   | AUC          |
|----------------------------|-----------------|------------|--------|--------|---------|-------|--------------|
| Cross-technique validation | Full transcript | SVM        | 75.87% | 85.47% | 80.67%  | 0.616 | <b>0.896</b> |
|                            |                 | RF         | 69.61% | 85.08% | 77.35%  | 0.554 | 0.870        |
|                            |                 | NB         | 80.99% | 57.76% | 69.37%  | 0.400 | 0.785        |
|                            |                 | GLM        | 77.51% | 81.07% | 79.29%  | 0.586 | 0.876        |
|                            | Mature mRNA     | SVM        | 88.48% | 89.05% | 88.77%  | 0.775 | <b>0.962</b> |
|                            |                 | RF         | 81.42% | 92.69% | 87.05%  | 0.746 | 0.955        |
|                            |                 | NB         | 91.83% | 52.81% | 72.32%  | 0.485 | 0.855        |
|                            |                 | GLM        | 89.63% | 84.43% | 87.03%  | 0.742 | 0.949        |
| Cross-cell type validation | Full transcript | SVM        | 80.13% | 85.98% | 83.06%  | 0.662 | <b>0.918</b> |
|                            |                 | RF         | 73.05% | 85.63% | 79.34%  | 0.592 | 0.890        |
|                            |                 | NB         | 81.64% | 59.12% | 70.38%  | 0.420 | 0.805        |
|                            |                 | GLM        | 80.31% | 81.64% | 80.98%  | 0.620 | 0.894        |
|                            | Mature mRNA     | SVM        | 93.87% | 86.15% | 90.01%  | 0.803 | <b>0.970</b> |
|                            |                 | RF         | 89.15% | 92.36% | 90.76%  | 0.816 | 0.969        |
|                            |                 | NB         | 91.54% | 53.08% | 72.31%  | 0.483 | 0.860        |
|                            |                 | GLM        | 93.63% | 81.04% | 87.34%  | 0.753 | 0.953        |

Note: We randomly selected 80% of experimentally validated m5U sites as training dataset and the performance of predictors were evaluated by the rest of 20% of m5U sites as independent testing data.

Table S4. Whole Dataset Performance evaluation

| Full  | 1      | 2      | 3      | 4      | 5      | 6      | 7      | 8      | 9      | 10     | Average |
|-------|--------|--------|--------|--------|--------|--------|--------|--------|--------|--------|---------|
| AUROC | 0.960  | 0.960  | 0.955  | 0.953  | 0.950  | 0.957  | 0.950  | 0.954  | 0.961  | 0.956  | 0.956   |
| MCC   | 0.784  | 0.781  | 0.770  | 0.755  | 0.747  | 0.769  | 0.748  | 0.773  | 0.781  | 0.763  | 0.767   |
| SEN   | 89.72% | 87.82% | 88.23% | 87.69% | 86.20% | 89.45% | 86.60% | 87.01% | 89.17% | 87.14% | 87.90%  |
| SPE   | 88.63% | 90.26% | 88.77% | 87.82% | 88.50% | 87.42% | 88.23% | 90.26% | 88.90% | 89.17% | 88.80%  |
| ACC   | 89.17% | 89.04% | 88.50% | 87.75% | 87.35% | 88.43% | 87.42% | 88.63% | 89.04% | 88.16% | 88.35%  |

Table S5. Whole Dataset Performance evaluation

| Mature | 1      | 2      | 3      | 4      | 5      | 6      | 7      | 8      | 9      | 10     | Average |
|--------|--------|--------|--------|--------|--------|--------|--------|--------|--------|--------|---------|
| AUROC  | 0.957  | 0.959  | 0.937  | 0.956  | 0.960  | 0.954  | 0.943  | 0.960  | 0.955  | 0.961  | 0.954   |
| MCC    | 0.786  | 0.794  | 0.765  | 0.793  | 0.773  | 0.805  | 0.789  | 0.814  | 0.819  | 0.811  | 0.795   |
| SEN    | 86.18% | 86.99% | 85.37% | 89.84% | 87.40% | 89.02% | 87.40% | 87.80% | 87.40% | 86.99% | 87.44%  |
| SPE    | 92.28% | 92.28% | 91.06% | 89.43% | 89.84% | 91.46% | 91.46% | 93.50% | 94.31% | 93.90% | 91.95%  |
| ACC    | 89.23% | 89.63% | 88.21% | 89.63% | 88.62% | 90.24% | 89.43% | 90.65% | 90.85% | 90.45% | 89.70%  |

Table S6. miCLIP\_F\_train&FICC\_F\_test

|       | 1      | 2      | 3      | 4      | 5      | 6      | 7      | 8      | 9      | 10     | Average |
|-------|--------|--------|--------|--------|--------|--------|--------|--------|--------|--------|---------|
| AUROC | 0.908  | 0.915  | 0.907  | 0.912  | 0.912  | 0.908  | 0.910  | 0.916  | 0.904  | 0.911  | 0.910   |
| MCC   | 0.632  | 0.650  | 0.651  | 0.663  | 0.649  | 0.659  | 0.637  | 0.683  | 0.637  | 0.662  | 0.652   |
| SEN   | 74.03% | 76.00% | 75.80% | 75.32% | 73.62% | 75.39% | 74.64% | 77.36% | 75.12% | 76.27% | 75.36%  |
| SPE   | 88.51% | 88.51% | 88.72% | 90.21% | 90.35% | 89.80% | 88.44% | 90.35% | 88.04% | 89.33% | 89.23%  |
| ACC   | 81.27% | 82.26% | 82.26% | 82.77% | 81.99% | 82.60% | 81.54% | 83.85% | 81.58% | 82.80% | 82.29%  |

<sup>a</sup> miCLIP\_F dataset as train dataset and FICC\_F dataset as an independent dataset

Table S7. miCLIP\_M\_train&FICC\_M\_test

|       | 1      | 2      | 3      | 4      | 5      | 6      | 7      | 8      | 9      | 10     | Average |
|-------|--------|--------|--------|--------|--------|--------|--------|--------|--------|--------|---------|
| AUROC | 0.972  | 0.971  | 0.967  | 0.978  | 0.966  | 0.969  | 0.970  | 0.984  | 0.961  | 0.966  | 0.970   |
| MCC   | 0.824  | 0.822  | 0.822  | 0.854  | 0.800  | 0.792  | 0.797  | 0.844  | 0.743  | 0.798  | 0.809   |
| SEN   | 89.98% | 91.93% | 91.93% | 91.20% | 90.22% | 89.98% | 88.75% | 92.42% | 86.31% | 88.02% | 90.07%  |
| SPE   | 92.42% | 90.22% | 90.22% | 94.13% | 89.73% | 89.24% | 90.95% | 91.93% | 88.02% | 91.69% | 90.86%  |
| ACC   | 91.20% | 91.08% | 91.08% | 92.67% | 89.98% | 89.61% | 89.85% | 92.18% | 87.16% | 89.85% | 90.46%  |

<sup>a</sup> miCLIP\_M dataset as train dataset and FICC\_M dataset as an independent dataset

Table S8. FICC\_F\_train&miCLIP\_F\_test

|       | 1      | 2      | 3      | 4      | 5      | 6      | 7      | 8      | 9      | 10     | Average |
|-------|--------|--------|--------|--------|--------|--------|--------|--------|--------|--------|---------|
| AUROC | 0.852  | 0.853  | 0.851  | 0.852  | 0.859  | 0.844  | 0.860  | 0.858  | 0.849  | 0.851  | 0.853   |
| MCC   | 0.487  | 0.504  | 0.494  | 0.493  | 0.494  | 0.476  | 0.509  | 0.500  | 0.488  | 0.502  | 0.495   |
| SEN   | 56.58% | 57.75% | 56.40% | 55.87% | 56.76% | 55.24% | 56.45% | 58.11% | 54.97% | 56.63% | 56.48%  |
| SPE   | 89.44% | 89.93% | 90.07% | 90.38% | 89.89% | 89.48% | 91.24% | 89.39% | 90.61% | 90.61% | 90.10%  |
| ACC   | 73.01% | 73.84% | 73.24% | 73.12% | 73.33% | 72.36% | 73.84% | 73.75% | 72.79% | 73.62% | 73.29%  |

<sup>a</sup> FICC\_F dataset as train dataset and miCLIP\_F dataset as an independent dataset

Table S9. FICC\_M\_train&miCLIP\_M\_test

|       | 1      | 2      | 3      | 4      | 5      | 6      | 7      | 8      | 9      | 10     | Average |
|-------|--------|--------|--------|--------|--------|--------|--------|--------|--------|--------|---------|
| AUROC | 0.881  | 0.884  | 0.866  | 0.877  | 0.868  | 0.883  | 0.881  | 0.857  | 0.868  | 0.863  | 0.873   |
| MCC   | 0.441  | 0.460  | 0.424  | 0.475  | 0.438  | 0.457  | 0.448  | 0.432  | 0.468  | 0.445  | 0.449   |
| SEN   | 40.10% | 38.40% | 37.67% | 42.77% | 35.72% | 40.58% | 36.33% | 38.40% | 40.10% | 38.03% | 38.81%  |
| SPE   | 96.35% | 98.42% | 96.60% | 97.08% | 98.42% | 97.08% | 98.66% | 96.72% | 98.06% | 97.69% | 97.51%  |
| ACC   | 68.23% | 68.41% | 67.13% | 69.93% | 67.07% | 68.83% | 67.50% | 67.56% | 69.08% | 67.86% | 68.16%  |

<sup>a</sup> FICC\_M dataset as train dataset and miCLIP\_M dataset as an independent dataset

Table S10. HEK293\_F\_train&HAP1\_F\_test

|       | 1      | 2      | 3      | 4      | 5      | 6      | 7      | 8      | 9      | 10     | Average |
|-------|--------|--------|--------|--------|--------|--------|--------|--------|--------|--------|---------|
| AUROC | 0.940  | 0.940  | 0.933  | 0.940  | 0.940  | 0.947  | 0.946  | 0.942  | 0.943  | 0.943  | 0.941   |
| MCC   | 0.715  | 0.729  | 0.721  | 0.720  | 0.729  | 0.737  | 0.734  | 0.717  | 0.720  | 0.737  | 0.726   |
| SEN   | 83.48% | 82.18% | 82.83% | 83.40% | 83.65% | 82.91% | 82.51% | 81.61% | 80.55% | 84.78% | 82.79%  |
| SPE   | 87.96% | 90.48% | 89.10% | 88.53% | 89.18% | 90.56% | 90.64% | 89.83% | 91.05% | 88.85% | 89.62%  |
| ACC   | 85.72% | 86.33% | 85.96% | 85.96% | 86.41% | 86.74% | 86.57% | 85.72% | 85.80% | 86.82% | 86.20%  |

<sup>a</sup> HEK293\_F dataset as train dataset and HAP1\_F test dataset as an independent dataset

Table S11. HEK293\_M\_train&HAP1\_M\_test

|       | 1      | 2      | 3      | 4      | 5      | 6      | 7      | 8      | 9      | 10     | Average |
|-------|--------|--------|--------|--------|--------|--------|--------|--------|--------|--------|---------|
| AUROC | 0.981  | 0.985  | 0.981  | 0.982  | 0.979  | 0.981  | 0.982  | 0.980  | 0.978  | 0.976  | 0.981   |
| MCC   | 0.842  | 0.830  | 0.863  | 0.871  | 0.829  | 0.848  | 0.848  | 0.851  | 0.827  | 0.842  | 0.845   |
| SEN   | 95.33% | 95.88% | 94.51% | 95.05% | 95.05% | 95.33% | 95.88% | 96.15% | 95.60% | 95.33% | 95.41%  |
| SPE   | 88.74% | 86.81% | 91.76% | 92.03% | 87.64% | 89.29% | 88.74% | 88.74% | 86.81% | 88.74% | 88.93%  |
| ACC   | 92.03% | 91.35% | 93.13% | 93.54% | 91.35% | 92.31% | 92.31% | 92.45% | 91.21% | 92.03% | 92.17%  |

<sup>a</sup> HEK293\_M dataset as train dataset and HAP1\_M test dataset as an independent dataset

Table S12. HAP1\_F\_train&HEK293\_F\_test

|       | 1      | 2      | 3      | 4      | 5      | 6      | 7      | 8      | 9      | 10     | Average |
|-------|--------|--------|--------|--------|--------|--------|--------|--------|--------|--------|---------|
| AUROC | 0.854  | 0.848  | 0.860  | 0.848  | 0.850  | 0.857  | 0.855  | 0.861  | 0.861  | 0.872  | 0.857   |
| MCC   | 0.504  | 0.493  | 0.505  | 0.487  | 0.510  | 0.509  | 0.508  | 0.504  | 0.524  | 0.530  | 0.507   |
| SEN   | 55.17% | 58.94% | 56.51% | 56.06% | 57.80% | 57.44% | 58.82% | 59.02% | 59.99% | 58.01% | 57.77%  |
| SPE   | 91.77% | 88.20% | 90.88% | 89.83% | 90.43% | 90.56% | 89.50% | 89.06% | 89.99% | 91.85% | 90.21%  |
| ACC   | 73.47% | 73.57% | 73.69% | 72.94% | 74.12% | 74.00% | 74.16% | 74.04% | 74.99% | 74.93% | 73.99%  |

<sup>a</sup> HAP1\_F dataset as train dataset and HEK293\_F test dataset as an independent dataset

Table S13. HAP1\_M\_train&HEK293\_M\_test

|       | 1      | 2      | 3      | 4      | 5      | 6      | 7      | 8      | 9      | 10     | Average |
|-------|--------|--------|--------|--------|--------|--------|--------|--------|--------|--------|---------|
| AUROC | 0.863  | 0.877  | 0.870  | 0.867  | 0.875  | 0.869  | 0.894  | 0.854  | 0.861  | 0.878  | 0.871   |
| MCC   | 0.450  | 0.470  | 0.456  | 0.478  | 0.454  | 0.463  | 0.457  | 0.448  | 0.446  | 0.483  | 0.461   |
| SEN   | 41.24% | 38.02% | 39.06% | 42.28% | 39.06% | 40.44% | 36.87% | 36.52% | 37.21% | 39.40% | 39.01%  |
| SPE   | 96.31% | 99.19% | 97.81% | 97.58% | 97.70% | 97.58% | 98.96% | 98.62% | 98.16% | 99.31% | 98.12%  |
| ACC   | 68.78% | 68.61% | 68.43% | 69.93% | 68.38% | 69.01% | 67.91% | 67.57% | 67.68% | 69.35% | 68.57%  |

<sup>a</sup> HAP1\_M dataset as train dataset and HEK293\_M test dataset as an independent dataset

Table S14. Performance Evaluation by FDR and FOR at Different Thresholds

| Mode            | Threshold | TPR   | FDR   | FOR   |
|-----------------|-----------|-------|-------|-------|
| Full Transcript | 0.1       | 0.985 | 0.322 | 0.027 |
|                 | 0.2       | 0.970 | 0.262 | 0.043 |
|                 | 0.3       | 0.958 | 0.212 | 0.053 |
|                 | 0.4       | 0.916 | 0.181 | 0.095 |
|                 | 0.5       | 0.876 | 0.140 | 0.127 |
|                 | 0.6       | 0.838 | 0.119 | 0.155 |
|                 | 0.7       | 0.773 | 0.089 | 0.197 |
|                 | 0.8       | 0.685 | 0.061 | 0.248 |
|                 | 0.9       | 0.463 | 0.037 | 0.354 |
| Mature mRNA     | 0.1       | 0.972 | 0.269 | 0.042 |
|                 | 0.2       | 0.931 | 0.196 | 0.082 |
|                 | 0.3       | 0.911 | 0.164 | 0.098 |
|                 | 0.4       | 0.862 | 0.142 | 0.139 |
|                 | 0.5       | 0.846 | 0.107 | 0.147 |
|                 | 0.6       | 0.821 | 0.082 | 0.162 |
|                 | 0.7       | 0.776 | 0.073 | 0.192 |
|                 | 0.8       | 0.720 | 0.048 | 0.225 |
|                 | 0.9       | 0.557 | 0.021 | 0.310 |

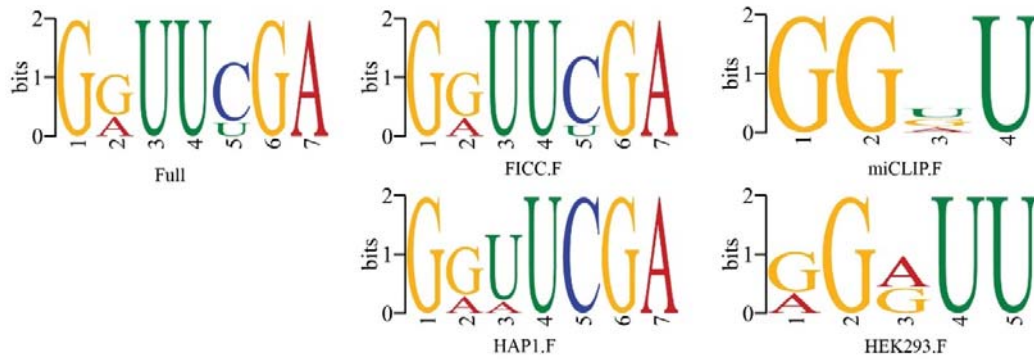

Figure S1. Motif analysis of positive m5U sites generated from different cell types and sequencing methods
